# Supplementary material for: Digital image colorimetry coupled with a multichannel membrane filtration-enrichment technique to detect low concentration dyes
Source: Royal Society of Chemistry journal article supplement (doi:10.1039/c6ay00022c), 2016-01-01
Supplement: c6ay00022c1.pdf [file c6ay00022c1.pdf]

## Supplementary material

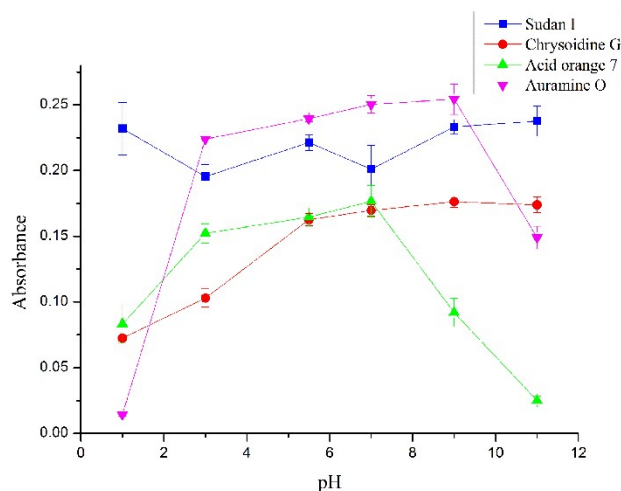

**Fig. S1.** Effect of pH on absorbance at 485 nm for Sudan I, 438 nm for Chrysoidine G, 485 nm for Acid orange 7, and 449 nm for Auramine O. Experiment conditions: concentration of dyes,  $30 \mu\text{g L}^{-1}$ , vacuum degree, 0.04 MPa; sample volume, 15 mL.

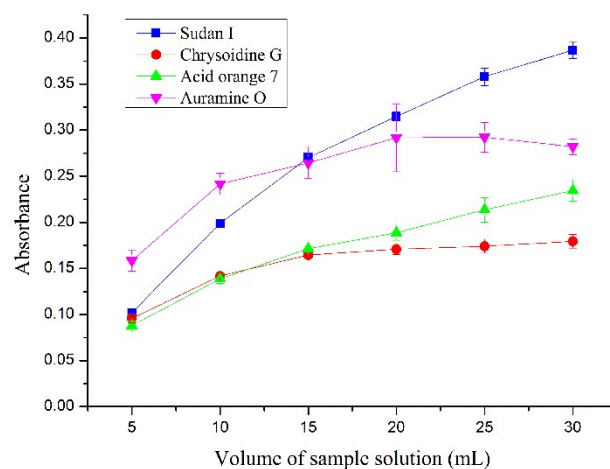

**Fig. S2.** Effect of sample volume on absorbance at 485 nm for Sudan I, 438 nm for Chrysoidine G, 485 nm for Acid orange 7, and 449 nm for Auramine O. Experiment conditions: concentration of dyes,  $30 \mu\text{g L}^{-1}$ ; vacuum degree, 0.04 MPa.

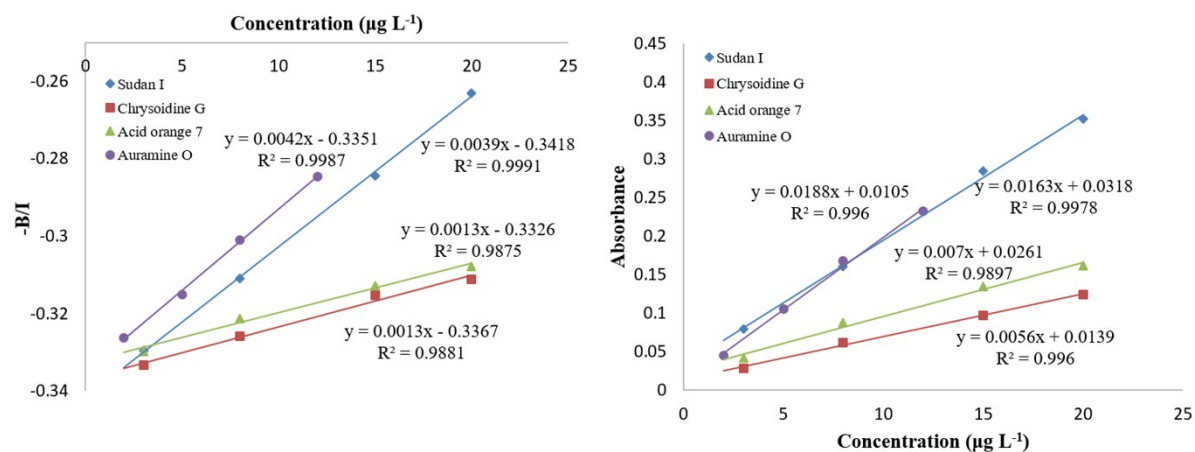

**Fig. S3.** The lineal functions used to calculate the LODs.
